# Supplementary material
Source: publisher site journal article supplement (https://www.dovepress.com/article/416294)
Supplement: Supplementary file 1 [file get_supplementary_file.php]

**TABLE S1.** The target sequences of each pair of probes in CNVplex technique.

| Probe   | Genome region<br>(GRCh37/hg19) | Binding<br>region | Product<br>length | Binding sequences                                                       |
|---------|--------------------------------|-------------------|-------------------|-------------------------------------------------------------------------|
| DMDE01A | 33229573                       | EXON01            | 155               | CTGGGAGGCAATTACCTTCGAGAAAAACGAATAGGAAAAACT<br>GAAGTGTTACTTTTT           |
| DMDE01B | 33229475                       | EXON01            | 160               | GCCTACTGGAGCAATAAAGTTTGAAGAAGTTTACCAGGTTTTT<br>TTTATCGCTGCCTTG          |
| DMDE02A | 33038465                       | INTRON01          | 145               | TTTAATTTGGATGCCCCAAACCAGCATCACTCATGTTTAATTCC<br>ATTTATCAATG             |
| DMDE02B | 33038296                       | EXON02            | 167               | GCATTTTAGATGAAAGAGAAGATGTTCAAAGAAAACATTCAC<br>AAAATGGGTAAATGCACA        |
| DMDE02C | 33038116                       | INTRON02          | 169               | CATTTTATTTAGCTGTGCAAATCTGGAAATATTATGTTCACTCT<br>TATTTAAGGAGTAAGCAGCAGA  |
| DMDE03A | 32867916                       | EXON03            | 110               | TTCAGTTTGGGAAGCAGCATATTGAGAACCTCTTCAGTGACCTA<br>CAGGATGGG               |
| DMDE03B | 32867865                       | EXON03            | 130               | CGCCTCCTAGACCTCCTCGAAGGCTGACAGGGCAAAAAGT                                |
| DMDE04A | 32862943                       | EXON04            | 101               | AAGGATCCACAAGAGTTCATGCCCTGAACAATGTCAACAAGGC<br>ACTGC                    |
| DMDE04B | 32862899                       | EXON04            | 148               | CACTGCGGGTTTTGCAGAACAATAATGTAAGTAGTACCCTGGA<br>CAAGGTCTGG               |
| DMDE05A | 32841495                       | EXON05            | 164               | TGTTTTACCCTTTCTTTAACAGGTTGATTTAGTGAATATTGGAA<br>GTAAGTACATCGTAGATGG     |
| DMDE05B | 32841410                       | EXON05            | 116               | GATTTGGAATATAATCCTCCACTGGCAGGTAAGAATCCTGATGA<br>ATGGTTTCCTTTTG          |
| DMDE06A | 32834689                       | EXON06            | 148               | ACCAACAGTGAAAAGATTCTCCTGAGCTGGGTCCGACAATCAA<br>CTCGTAATT                |
| DMDE06B | 32834627                       | EXON06            | 136               | TGTAATCAACTTCACCACCAGCTGGTCTGATGGCTGGCTTTGA<br>ATG                      |
| DMDE07A | 32827691                       | EXON07            | 139               | GACTGGAATAGTGTGGTTTGCCAGCAGTCAGCCACACAACGAC<br>TGGA                     |
| DMDE07B | 32827628                       | EXON07            | 122               | AACATCGCCAGATATCAATTAGGCATAGAGAACTACTCGATC<br>CTGAAGGTTGGTAAATT         |
| DMDE08A | 32717403                       | EXON08            | 163               | GATGTGTAGTGTTAATGTGCTTACAGATGTTGATACCACCTATC<br>CAGATAAGAAGTCCATCTTAATG |
| DMDE08B | 32717319                       | EXON08            | 101               | GCCTCAACAAGTGAGCATTGAAGCCATCCAGGAAGTGGAATG<br>TTGCC                     |
| DMDE09A | 32716073                       | EXON09            | 151               | GCACAGGGATATGAGAGAAGTCTTCCCTAAGCCTCGATTCAA<br>GAGCTATGCC                |
| DMDE09B | 32716031                       | EXON09            | 142               | GAGCTATGCCTACACACAGGCTGCTTATGTCACCACCTCTGACC<br>CTACACG                 |
| DMDE10A | 32663239                       | EXON10            | 113               | TTGGAAGCTCCTGAAGACAAGTCATTTGGCAGTTCATTGATGGA<br>GAGTGAAGTAA             |

|         |          |          |     |                                                                        |
|---------|----------|----------|-----|------------------------------------------------------------------------|
| DMDE10B | 32663170 | EXON10   | 116 | TCAAACAGCTTTAGAAAGAAGTATTATCGTGGCTTCTTTCTGCTG<br>AGGACACATTGCA         |
| DMDE11A | 32662410 | EXON11   | 136 | AGGGGTACATGATGGATTTGACAGCCCATCAGGGCCGGTTGG<br>T                        |
| DMDE11B | 32662303 | EXON11   | 154 | GAAACTGAAGTACAAGAGCAGATGAATCTCCTAAATTCAAGAT<br>GGGAATGCCTCAGG          |
| DMDE12A | 32632494 | EXON12   | 114 | GAATGACTGGCTAACAAAAACAGAAGAAAGAACAAGGAAAAT<br>GGAGGAAGAGCCTC           |
| DMDE12B | 32632442 | EXON12   | 160 | CCTACCTTATGTTGTTGACTTGGCGTTTTAGGTCTTCAAGATCA<br>GGTCCAAGAGG            |
| DMDE13A | 32613957 | EXON13   | 154 | AAGAAGATCTAGAACAAGAACAAGTCAGGGTCAATTCTCTCAC<br>TCACATGGTGGTGGT         |
| DMDE13B | 32613894 | EXON13   | 113 | GAATCTAGTGGAGATCACGCAACTGCTGCTTTGGAAGAACAAC<br>TTAAGGTCAGA             |
| DMDE14A | 32592049 | INTRON13 | 125 | TCCAACCTTAGCGTACATAGGAGACTGAGATACTTTGGCAAAT<br>TATTCATGCCATTTTTAA      |
| DMDE14B | 32591965 | INTRON13 | 139 | GCTGTGCTTGATTGTCTCTTCTCCAGGTATTGGGAGATCGATGG<br>GCAA                   |
| DMDE15A | 32591710 | EXON15   | 119 | TGGCTTTCAGAAAAAGAAGATGCAGTGAACAAGATTCACACAA<br>CTGGCTTTAAAGATC         |
| DMDE15B | 32591643 | INTRON15 | 125 | GAAATGTTATCAAGTCTTCAAAAAGTGGCCGTATGTACTTTCTA<br>GCTTTCAATGGTCTTATAAAAA |
| DMDE16A | 32584028 | INTRON15 | 162 | ACTATAGTGGTGTATGGAATGCAACCCAGGCTTATCTGTGATC<br>TTTCTTGTTTTAACAGG       |
| DMDE16B | 32583978 | EXON16   | 148 | TTTAACAGGTTTTAAAAGCGGATCTAGAAAAAGAAAAGCAATC<br>CATGGGCAAAGT            |
| DMDE16C | 32583853 | EXON16   | 154 | GCTGGATAACTTTGCCCGTGTGGGATAATTTAGTCCAAAAAC<br>TTGAAAAGAGTACA           |
| DMDE17A | 32563526 | INTRON16 | 113 | CAACAAGCAAGAACAGTTTCTCATTATTTCTTTGCCACTCCA<br>AGCAGTCTTTACTG           |
| DMDE17B | 32563367 | EXON17   | 139 | AGTAACTACGGTGACCACAAGGGAACAGATCCTGGTAAAGCAT<br>GCTCAAGA                |
| DMDE17C | 32563327 | EXON17   | 99  | TGCTCAAGAGGAACTTCCACCACCACCTCCCCAAAAGAAGAGG<br>CAGA                    |
| DMDE18A | 32536210 | EXON18   | 122 | TGATATAACTGAACTTCACAGCTGGATTACTCGCTCAGAAGCTG<br>TGTTGCAGAGTCCTG        |
| DMDE18B | 32536162 | EXON18   | 151 | CAGAGTCTGAATTTGCAATCTTTCGGAAGGAAGGCAACTTCTC<br>AGACTTAAAAGA            |
| DMDE19A | 32519959 | INTRON18 | 142 | ACTCATCTTTGCTCTCATGCTGCAGGCCATAGAGCGAGAAAAA<br>GCTGAGA                 |
| DMDE19B | 32519866 | INTRON19 | 157 | CCCTGGTGAACAGATGGTGAATGGTAATTACACGAGTTGATT<br>AGATAATCTTCTTA           |

|         |          |          |     |                                                                         |
|---------|----------|----------|-----|-------------------------------------------------------------------------|
| DMDE20A | 32509585 | EXON20   | 139 | CAAGCCTCAGAACAACCTGAACAGCCGGTGGATCGAATTCTGCC<br>AGTTG                   |
| DMDE20B | 32509467 | EXON20   | 107 | TTGGAGCAGATGACAACTACTGCTGAAAACCTGGTTGAAAATCC<br>AACCCACC                |
| DMDE21A | 32503128 | EXON21   | 98  | CCCTGAAAGAGAAAGGACAAGGACCCATGTTCTGGATGCAGA<br>CTTG                      |
| DMDE21B | 32503087 | EXON21   | 141 | CAGACTTTGTGGCCTTTACAAATCATTTTTAAGCAAGTCTTTTCTG<br>ATGTGCA               |
| DMDE21C | 32502923 | INTRON21 | 125 | TGAAACAATAATTTCTGTAATGGAACCATTCTCCCTACAACCT<br>GTATTAACAAGGAACGAAATACTG |
| DMDE22A | 32490275 | INTRON22 | 104 | GCAGAGACTCGGGGAATTGCAGGTCTGTGAATATTTGAATGTC<br>AAAACAATAAA              |
| DMDE23A | 32486682 | EXON23   | 95  | TTGAGGGACGCTGGAAGAAGCTCTCTCCAGCTGGTTGAGC                                |
| DMDE24A | 32482721 | EXON24   | 107 | CCCTTGGGGATTTCAGAAATTTAAAAAGCAGCTGAAACAGTG<br>CAGAGTAAGATTT             |
| DMDE25A | 32481552 | INTRON25 | 139 | GTGGGATCACATGTGCCAACAGGTATAGACAATCTCTTTCAGTG<br>TGGCTTG                 |
| DMDE26A | 32472852 | EXON26   | 110 | GAGATGCACGAATGGATGACACAAGCTGAAGAAGAGTATCTTG<br>AGAGAGATTTTGAA           |
| DMDE27A | 32466571 | INTRON27 | 101 | AATGGGAAATGCAAGACTTTGGAAGTCAGTTGCTTTTCTGGTC<br>TTTGTC                   |
| DMDE28A | 32459298 | EXON28   | 113 | GCGGAGCTGAGGAAATCTCTGAGGTGCTAGATGTAAGTTGTAA<br>ATTAAGCCAAATGATGA        |
| DMDE29A | 32456363 | EXON29   | 125 | GAGACATTTAATTCTCGTTGGAGGGAACACATGAAGAGGTAT<br>GAAGATAAGTGAAAAATCTCTTT   |
| DMDE30A | 32429866 | INTRON30 | 136 | CAATGCCTCAGGAAGCCCAGGCAAGTACATCTGGGAATCAGC<br>TTCC                      |
| DMDE31A | 32408200 | EXON31   | 125 | GGCTGCCCAAAGAGTCCTGTCTCAGATTGATGTTGCACAGGTAT<br>ATGTTATTCA              |
| DMDE32A | 32407620 | EXON32   | 163 | GGAAGTAGTACAGTCACAGCTAAATCATTTGTGTGGTATGTATTT<br>CTGGTGGCAAATACGCAG     |
| DMDE33A | 32404428 | EXON33   | 142 | TGCATTATAATGAGCTGGGAGCAAAGGTGTGTGCATGCTGAGA<br>CCACA                    |
| DMDE34A | 32398622 | INTRON34 | 160 | GGATTCTGAAGTTGCCTGGGGAAAGGTAACCTATATCACTG<br>AAGGTTATTTGAACA            |
| DMDE35A | 32383215 | EXON35   | 148 | CAGTTTGGGCAAGAAGGAGACGTTGGTGGAAAGATAAACTCAG<br>TCTTCTGAATAGT            |
| DMDE36A | 32382707 | EXON36   | 121 | GAGAAAAAGAAACCCAGCAAAAAGAAGACGTGCTTAAGGTA<br>GCAAATAAAATATGAAAAG        |
| DMDE37A | 32380904 | INTRON37 | 163 | GCCATTTACACAGAATTAAGACTGGAAAGGTAGGAAGATCTA<br>CTCCAAGGTGGAACTTG         |
| DMDE38A | 32366539 | EXON38   | 151 | CAGCAGGGGGTGAATCTGAAAGAGGAAGACTTCAATAAAGATA<br>TGGTAAATTGGTTG           |

|         |          |          |     |                                                                         |
|---------|----------|----------|-----|-------------------------------------------------------------------------|
| DMDE39A | 32364150 | EXON39   | 166 | GGTACTGTAAAAGAATTGTTGCAAAGAGGAGACAACCTACAAC<br>AAAGAATCACAGATGAGAGAAA   |
| DMDE40A | 32361268 | EXON40   | 122 | AAAAAATTAGCCAGCTACCTGAGCCCAGAGATGAAAGGAAAA<br>TAAAGGTAATGTTGTTTT        |
| DMDE41A | 32360229 | EXON41   | 110 | GCAAATTTGCTCAGTTTCGAAGACTCAACTTTGCACAAATTGTG<br>AGTTGTTACTGG            |
| DMDE42A | 32328241 | EXON42   | 116 | CAACTTCTCAATGCTCCTGACCTCTGTGCTAAGGACTTTGAAGA<br>TCTCTTTAAGCAAGA         |
| DMDE43A | 32306005 | INTRON42 | 160 | GAGCGATCCACTCTCTCAGGATGAGGTCTGTGATTACCTATTG<br>AATTTGAACATGTCA          |
| DMDE43B | 32305708 | EXON43   | 98  | TGTGGAAAGGGTGAAGCTACAGGAAGCTCTCTCCAGCTTGAT<br>TTCCA                     |
| DMDE43C | 32305664 | EXON43   | 110 | GATTTCCAATGGGAAAAAGTTAAACAAAATGTACAAGGACCGAC<br>AAGGGTAGGTAACA          |
| DMDE44A | 32235175 | EXON44   | 104 | CCATATGCTTTTACCTGCAGGCGATTTGACAGATCTGTTGAGAA<br>ATGGCG                  |
| DMDE44B | 32235123 | EXON44   | 160 | AACTGTTTCAGCTTCTGTTAGCCACTGATTAATATCTTTATATCA<br>TAATGAAAACGCCGCC       |
| DMDE44C | 32235067 | EXON44   | 163 | CAGTTTCTCAGAAAGACACAAATTCCTGAGAATTGGGAACATG<br>CTAAATACAAATGGTATCT      |
| DMDE45A | 31986742 | INTRON44 | 122 | TCATAGGGAAATTTTACATGGAGCTTTTGTATTTCTTTCTTTC<br>CAGTACAACCTGCA           |
| DMDE45B | 31986576 | EXON45   | 116 | CAAACGTGTGTCAGAACATTGAATGCAACTGGGGAAGAAATAA<br>TTCAGCAATCCTC            |
| DMDE45C | 31986495 | EXON45   | 96  | TGGGAAGCCTGAATCTGCGGTGGCAGGAGGTCTGCAAACAGC                              |
| DMDE46A | 31950247 | EXON46   | 150 | GGAAGCAGATAACATTGCTAGTATCCCCTGAACTGGAAAA<br>GAGCAGCACTAA                |
| DMDE46B | 31950197 | EXON46   | 163 | GCAACTAAAAGAAAAGCTTGAGCAAGTCAAGGTAATTTTATTT<br>TCTCAAATCCCCAGGG         |
| DMDE46C | 31949769 | EXON46   | 166 | GAACAAAAGAATATCTTGTCAGAATTTCAAAGAGATTTAAATG<br>AATTTGTTTTATGGTTGGAGGAAG |
| DMDE47A | 31947846 | EXON47   | 98  | GTTTCAGTACTGGTGAAGAGTTGCCCTGCGCCAGGGAATTC<br>TCA                        |
| DMDE47B | 31947753 | EXON47   | 159 | TCCCATAAGCCCAGAAGAGCAAGATAAACTTGAAAATAAGCTC<br>AAGCAGACAAATCTC          |
| DMDE48A | 31893457 | EXON48   | 127 | CAGAGCTTTACCTGAGAAACAAGGAGAAATTGAAGCTCAAATA<br>AAAGACCTTGGGC            |
| DMDE48B | 31893400 | EXON48   | 104 | CTTGAAAAAAGCTTGAAGACCTTGAAGAGCAGTTAAATCATC<br>TGCTGCTGTGG               |
| DMDE48C | 31893353 | EXON48   | 118 | GCTGCTGTGGTTATCTCCTATTAGGAATCAGTTGAAAATTTATA<br>ACCAACCAAACCAAGA        |
| DMDE49A | 31854926 | EXON49   | 113 | GGGTTCTTTTCCCCAGGAAACTGAAATAGCAGTTCAAGCTAAAC<br>AACCGGATG               |

|         |          |          |     |                                                                         |
|---------|----------|----------|-----|-------------------------------------------------------------------------|
| DMDE49B | 31854883 | EXON49   | 110 | CAACCGGATGTGGAAGAGATTTTGTCTAAAGGGCAGCATTGTG<br>ACAAGGAAA                |
| DMDE50A | 31838389 | INTRON49 | 157 | GGAGAAAGGGTTTTGTATGGAGCAATTGATAAATATTTGTAG<br>GGTGGTTGGCTAAAA           |
| DMDE50B | 31838129 | EXON50   | 133 | TTCAAGAGCTGAGGGCAAAGCAGCCTGACCTAGCTCCTGGACT<br>GA                       |
| DMDE50C | 31838088 | INTRON50 | 148 | CCTGGACTGACCACTATTGGAGCCTGTAAGTATACTGGATCCCA<br>TTCTCTTTGGCT            |
| DMDE51A | 31792267 | EXON51   | 125 | TGTTACTCTGGTGACACAACCTGTGGTTACTAAGGAACTGCCA<br>TCTCCAACTAGAA            |
| DMDE51B | 31792212 | EXON51   | 101 | GCCATCTTCCTTGATGTTGGAGGTACCTGCTCTGGCAGATTCA<br>ACCG                     |
| DMDE51C | 31792127 | EXON51   | 154 | GCTTGATCAAGTTATAAAATCACAGAGGGTGATGGTGGGTGAC<br>CTTGAGGATATCA            |
| DMDE52A | 31747836 | EXON52   | 142 | CAATGCAGGATTTGGAACAGAGGCGTCCCCAGTTGGAAGAACT<br>CATTACC                  |
| DMDE52B | 31747794 | EXON52   | 104 | CATTACCCTGCCAAAAATTTGAAAAACAAGACCAGCAATCAA<br>GAGGCT                    |
| DMDE52C | 31747524 | INTRON52 | 160 | ATACATTTTTAAATCAATTCAGGGCTTATATAGTTGCAAAGCAT<br>GCATTGATGGGTGTG         |
| DMDE53A | 31697665 | EXON53   | 101 | GAATCAGTGGGATGAAGTACAAGAACACCTTCAGAACCGGAGG<br>CAACAGTT                 |
| DMDE53B | 31697571 | EXON53   | 101 | GAAGAAGCTGAGCAGGTCTTAGGACAGGCCAGCAAGCTTG<br>AGTCATG                     |
| DMDE53C | 31697504 | EXON53   | 128 | TCCCTATACAGTAGATGCAATCCAAAAGAAAATCACAGAAAACC<br>AAGTTAGTATCAAAGATACCTTT |
| DMDE54A | 31676246 | EXON54   | 148 | AAAATCTATAGCAGTTGGCCAAAGACCTCCGCCAGTGGCAGAC<br>AAATGTAGA                |
| DMDE54B | 31676194 | EXON54   | 136 | GGCAAATGACTTGGCCCTGAAACTTCTCCGGGATTATTCTGCAG<br>ATG                     |
| DMDE55A | 31645922 | EXON55   | 110 | ACTCATAGATTACTGCAACAGTTCCCCCTGGACCTGGAAAAGTT<br>TCTTGCCT                |
| DMDE55B | 31645878 | EXON55   | 104 | CTTGCTGGCTTACAGAAGCTGAAACAACCTGCCAATGTCCTACA<br>GGATGC                  |
| DMDE56A | 31525570 | EXON56   | 151 | CATATTCTTCTCTCTGCTGTCCTGTAGGACCTCCAAGGTGAAAT<br>TGAAGCTCAC              |
| DMDE56B | 31525357 | INTRON56 | 145 | AGACAATGAGGAAAATTTGGCCATTTTAATTCATTTGTGGCCTT<br>TTTGCTCC                |
| DMDE57A | 31515061 | EXON57   | 139 | TGGTACGCTGCTGTTCTTTTTCAGGTCCCATTTGGAAGCCAGTTC<br>TGA                    |
| DMDE57B | 31514920 | EXON57   | 148 | GGCGACTTTCAGCAGTTCAGAAGCAGAACGATGTACATAGGG<br>TAGGACATT                 |

|         |          |          |     |                                                                           |
|---------|----------|----------|-----|---------------------------------------------------------------------------|
| DMDE58A | 31497139 | EXON58   | 122 | TGAGACTGTACGAATATTTCTGACAGAGCAGCCTTTGGAAGGA<br>CTAGAGAACTCTACCAGG         |
| DMDE59A | 31496227 | EXON59   | 110 | GACTCTCTCCAAGATCACCTCGAGAAAGTCAAGGTACCGTCTAC<br>TTCTTTGCTTCA              |
| DMDE60A | 31462736 | EXON60   | 101 | TGACTATTGCACACAGGCACTTCGAGGAGAAATTGCGCCTCTG<br>AAAGA                      |
| DMDE61A | 31366781 | INTRON60 | 122 | TTTAAATTGTTCCCTCATTATATAGAATGAGAGAACATCATTCTC<br>TCCTTTTCCTCCCAGG         |
| DMDE61B | 31366701 | EXON61   | 98  | TGCATGAAGCCCACAGGGACTTTGGTCCAGCATCTCAGCACTTT<br>C                         |
| DMDE62A | 31341761 | EXON62   | 98  | CTTTTCAGCGTCTGTCCAGGGTCCCTGGGAGAGGCCATCTCGC                               |
| DMDE63A | 31279074 | EXON63   | 151 | CCCAAAATGACAGAGCTCTACCAGTCTTTAGGTAAGGACATGG<br>CCATGTTTCCTCC              |
| DMDE64A | 31241200 | EXON64   | 151 | AATGTCAGATTCTCAGCTTATAGGACTGCCATGAAACTCCGAAG<br>ACTGCAGAAGG               |
| DMDE65A | 31227775 | EXON65   | 136 | AGCTGCATGTGATGCCTTGGACCAGCACAACTCAAGCAAAAT<br>G                           |
| DMDE66A | 31224749 | EXON66   | 110 | GGGAGGATCCGTGCTCTGTCTTTTAAACTGGCATCATTCCCT<br>GTGTAAA                     |
| DMDE67A | 31222185 | EXON67   | 98  | GGATTTTGTGACCAGCGCAGGCTGGGCCTCCTTCTGCATGATT                               |
| DMDE68A | 31200863 | EXON68   | 157 | TGTAACATCTGCAAAGAGTGTCCAATCATTGGATTGAGGTATTA<br>GGAACCAAAAAAAAA           |
| DMDE69A | 31198486 | INTRON69 | 98  | CCATGGTGAATATTGCACTCCGGTAAGTTTGACGCCAGCCTGA<br>CG                         |
| DMDE70A | 31196782 | INTRON70 | 115 | GTCTTAGAGGGGGACAACATGGAAACGTGAGTAGTAGCAAAAG<br>CAGAACACACTCTTG            |
| DMDE71A | 31196077 | EXON71   | 148 | CATTTTTGTTTTGCAGTCCCGTTACTCTGATCAACTTCTGGCCA<br>GTAGATTCTG                |
| DMDE72A | 31191652 | INTRON72 | 116 | TCACGCATTGAACATTATGCTAGCAGGTATGAGACTAGTTGTAT<br>GCCAGGCAAATATTG           |
| DMDE73A | 31190467 | EXON73   | 128 | TCTTATCTAAATGATAGCATCTCTCTAATGAGAGCATGTAAGT<br>ATCCCATCTCTTTTACAAAATGTTCC |
| DMDE74A | 31187558 | INTRON74 | 122 | GAATCCTAGCAGATCTTGAGGAAGAAAACAGGTGAGTTTTCTTT<br>CTAGCTTTGTCATTGGTATG      |
| DMDE75A | 31165427 | EXON75   | 101 | GGAAGACCACAATAAACAGCTGGAGTCACAGTTACACAGGCTA<br>AGGCAGCT                   |
| DMDE76A | 31164430 | EXON76   | 136 | CCTATGCTGCTCCGAGTGGTTGGCAGTCAAACCTTCGGACTCCAT<br>GG                       |
| DMDE77A | 31152217 | INTRON77 | 166 | AACTCAACAACCTCTCCCTAGTTCAAGAGGTAAGCTCCAATAC<br>CTAGAAGGGACTCAGATT         |
| DMDE78A | 31144757 | INTRON78 | 136 | CCCCTGAAAAGCCAATGAGAGAGGTTAGTGAGATTCAGGCTCA<br>CGGCC                      |

DMDE79A 31140037 EXON79 159 TTTCTCTTGTTTTCCAGGACACAATGTAGGAAGTCTTTCCACA  
TGGCAGATGATT

---

**A**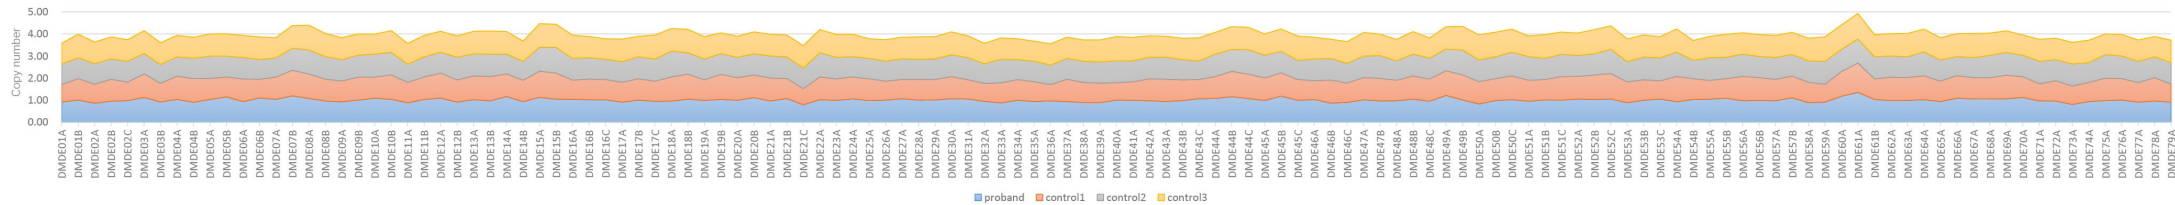**B**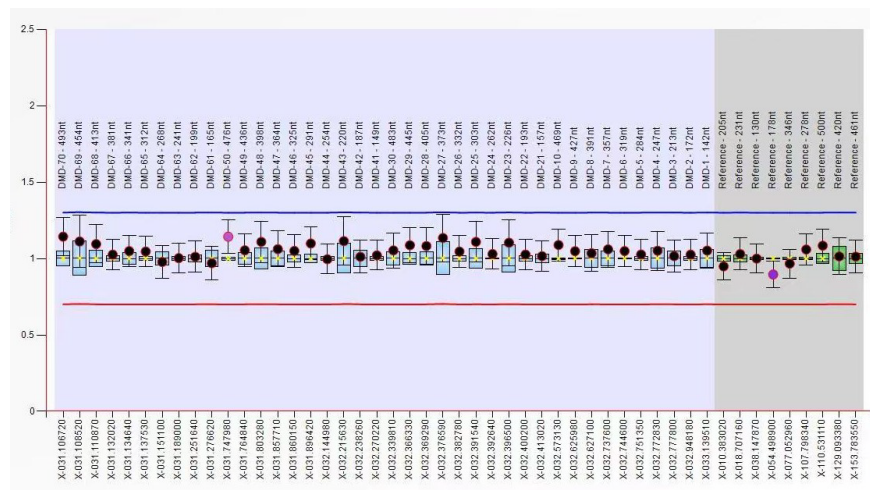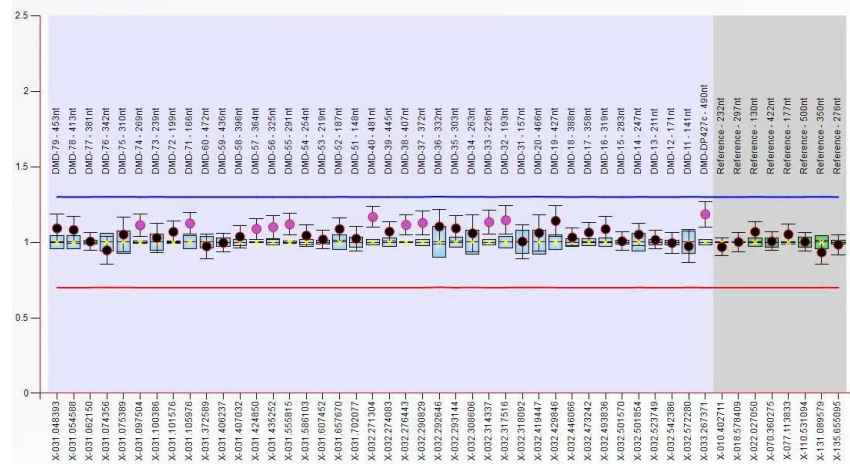

**FIGURE S1. CNVplex results of proband 1 (A) and proband 2 (B).**



**A**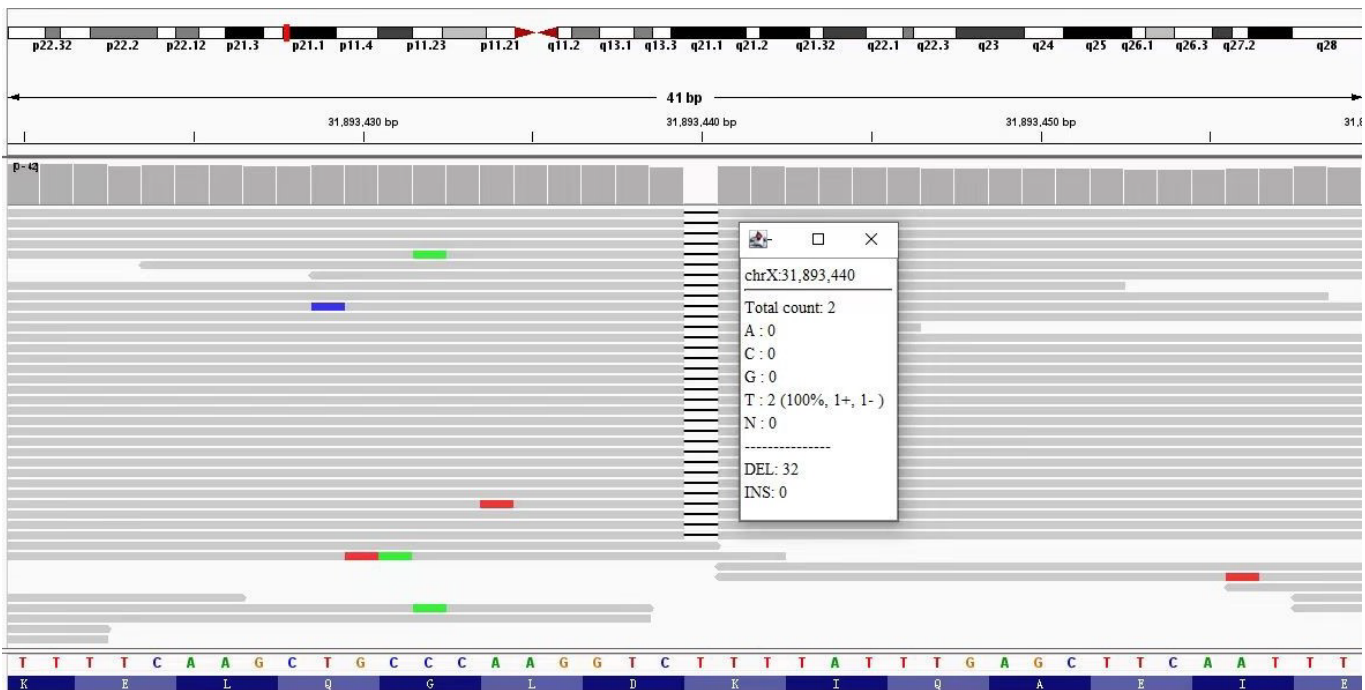**B**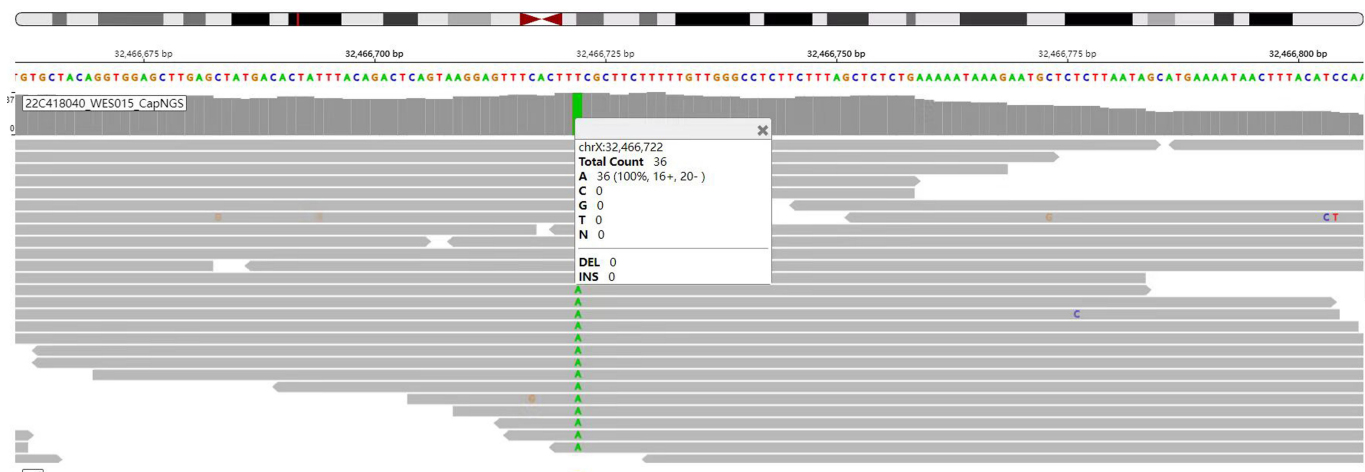

**FIGURE S2.** Whole exome sequencing results of proband 1 (A) and proband 2 (B).
